# Supplementary material
Source: PubMed Central journal article supplement (PMC4889384)

## **SI MATERIALS AND METHODS**

**Patients and samples.** Subjects were prospectively enrolled at diagnosis. The protocol included peri-operative collection of tissue, blood, and peritoneal fluid. Longitudinal clinical data was also collected. Patients indicated as “BRCA germline positive” were found to have a deleterious mutation in either BRCA1 or BRCA2 by commercial testing (Myriad Genetics, Inc.) or by NGS (1). Patients indicated as “BRCA germline negative” either had a low-risk family history suggesting hereditary mutation was unlikely or were evaluated with negative findings. Peritoneal cytopathology for the 17 ovarian cancer samples included 6 positive, 2 atypical, and 9 negative. Peritoneal cytopathology was negative for all control patients. Tumors were surgically staged according to the International Federation of Obstetrics and Gynecology (FIGO) criteria. Data analysis was performed blinded, and all patient samples were de-identified. The 37 peritoneal fluid samples of this study included 7 ascites and 30 peritoneal washes. If the liquid portion of a peritoneal fluid sample exceeded 2 mL, the sample was centrifuged at 1,000g for 3 minutes and excess supernatant was removed before DNA extraction.

**TP53 mutation detection in primary lesions.** TP53 mutations for most primary tumors had been previously established by NGS at a sequencing depth of ~300X as previously described (1), except in OvCA 01 - 03. For these 3 cancers (which were incidentally discovered after risk-reducing salpingo-oophorectomy), the microscopic lesion was isolated for DNA extraction via laser capture microdissection using a Veritus system (Arcturus) from consecutive formalin-fixed sections. DNA was extracted using the PicoPure DNA extraction kit (Arcturus) and TP53 exons were then PCR amplified for Sanger sequencing and analyzed for clonal somatic mutation as previously described (2, 3).

**TP53 capture library.** Thirteen 5' biotinylated 120 bp nucleotide xGen Lockdown Probes (IDT) were designed with 1x tiling to capture TP53 exons 4-10 and associated splice junctions. Two consecutive rounds of capture yielded >98% reads mapping to the targeted gene.

**Duplex Sequencing.** DNA was sonicated, end-repaired, a-tailed, and ligated with Duplex Sequencing adaptors (SI Appendix Fig. S1) using AMPure XP bead cleanups after each step (1.2X volume beads in steps before ligation and 1.0X volume beads after ligation). After 5 rounds of PCR amplification and a 1.0X AMPure XP bead cleanup, one-half of the total PCR product was enriched for TP53 exons 4-10 by two consecutive rounds of target capture with customized biotinylated oligonucleotides (IDT) and M-270 streptavidin beads (Life Technologies) followed by PCR amplification (4). In the final PCR reaction, an index sequence was added to each sample for multiplexing. Libraries were pooled and sequenced on an Illumina HiSeq2500. Lane percentage allocated to each sample was adjusted proportionally to the amount of starting DNA.

### **References:**

1. Walsh T, *et al.* (2011) Mutations in 12 genes for inherited ovarian, fallopian tube, and peritoneal carcinoma identified by massively parallel sequencing. *Proc Natl Acad Sci U S A* 108(44):18032-18037.
2. Swisher EM, *et al.* (2005) Tumor-specific p53 sequences in blood and peritoneal fluid of women with epithelial ovarian cancer. *Am J Obstet Gynecol* 193(3 Pt 1):662-667.

3. Norquist BM, *et al.* (2010) The molecular pathogenesis of hereditary ovarian carcinoma: alterations in the tubal epithelium of women with BRCA1 and BRCA2 mutations. *Cancer* 116(22):5261-5271.
4. Schmitt MW, *et al.* (2015) Sequencing small genomic targets with high efficiency and extreme accuracy. *Nat Methods* 12(5):423-425.

**SI Appendix Table S1. Clinical information of patients with ovarian cancer**

| sample ID | germline BRCA mutation | age | meno-pausal status | race         | history of chemotherapy | preoperative plasma CA125 | primary anatomic site of cancer | FIGO clinical stage | histology                             | peritoneal fluid sample | peritoneal cytopathology |
|-----------|------------------------|-----|--------------------|--------------|-------------------------|---------------------------|---------------------------------|---------------------|---------------------------------------|-------------------------|--------------------------|
| OvCA 01   | BRCA1                  | 46  | pre                | na           | yes (breast cancer)     | 16                        | fallopian tube                  | 0*                  | serous intraepithelial neoplasia      | peritoneal wash         | negative                 |
| OvCA 02   | BRCA1                  | 50  | post               | white        | no                      | 25                        | ovary                           | IA*                 | high-grade carcinoma                  | peritoneal wash         | negative                 |
| OvCA 03   | BRCA1                  | 62  | post               | multi-racial | yes (breast cancer)     | 18                        | fallopian tube                  | IC*                 | serous intraepithelial neoplasia      | peritoneal wash         | positive                 |
| OvCA 04   | negative               | 59  | post               | black        | no                      | 36                        | fallopian tube                  | IA                  | high-grade serous carcinoma           | peritoneal wash         | negative                 |
| OvCA 05   | negative               | 85  | post               | white        | no                      | 248                       | ovary                           | IC                  | high-grade serous carcinoma           | ascites                 | positive                 |
| OvCA 06   | negative               | 47  | pre                | white        | no                      | 131                       | ovary                           | IIB                 | high-grade serous carcinoma           | peritoneal wash         | negative                 |
| OvCA 07   | negative               | 65  | post               | white        | no                      | not detectable            | ovary                           | IIC                 | high-grade serous carcinoma           | ascites                 | negative                 |
| OvCA 08   | BRCA1                  | 50  | pre                | white        | no                      | 63                        | ovary                           | IIC                 | mixed endometrioid & serous carcinoma | ascites                 | positive                 |
| OvCA 09   | negative               | 68  | post               | white        | no                      | 103                       | ovary                           | IIIB                | high-grade serous carcinoma           | peritoneal wash         | negative                 |
| OvCA 10   | negative               | 61  | post               | white        | no                      | 534                       | ovary                           | IIIB                | high-grade serous carcinoma           | peritoneal wash         | negative                 |
| OvCA 11   | negative               | 54  | post               | asian        | no                      | 851                       | ovary                           | IIIB                | high-grade serous carcinoma           | ascites                 | positive                 |
| OvCA 12   | BRCA1                  | 52  | pre                | white        | no                      | 2238                      | ovary                           | IIIC                | high-grade serous carcinoma           | ascites                 | negative                 |
| OvCA 13   | BRCA2                  | 62  | post               | white        | no                      | 11                        | fallopian tube                  | IIIC                | high-grade serous carcinoma           | peritoneal wash         | atypical                 |
| OvCA 14   | negative               | 76  | post               | white        | no                      | 2294                      | ovary                           | IIIC                | high-grade serous carcinoma           | peritoneal wash         | positive                 |
| OvCA 15A† | BRCA1                  | 42  | post               | na           | yes (breast cancer)     | 209                       | ovary                           | na**                | high-grade serous carcinoma           | peritoneal wash         | negative                 |
| OvCA 15B† | BRCA1                  | 42  | post               | na           | yes (breast cancer)     | 1579                      | ovary                           | Recurrence          | high-grade serous carcinoma           | ascites                 | positive                 |
| OvCA 16   | negative               | 63  | post               | white        | no                      | 82                        | fallopian tube                  | Recurrence          | high-grade serous carcinoma           | peritoneal wash         | atypical                 |

Abbreviations: OvCA: ovarian cancer; na: not available

\*Microscopic cancers incidentally discovered at prophylactic surgery in women with germline BRCA mutations

\*\*Disease not staged, as patient was receiving chemotherapy for previously diagnosed breast cancer

† Samples 15A and 15B correspond to primary and recurrence surgeries from the same patient

**SI Appendix Table S2. Clinical information of control patients**

| patient ID | germline BRCA mutation | age at surgery | meno-pausal status | race  | history of chemotherapy | preoperative plasma CA125 | indication for surgery                                                     | benign surgical pathology           | peritoneal fluid sample | peritoneal fluid cytopathology |
|------------|------------------------|----------------|--------------------|-------|-------------------------|---------------------------|----------------------------------------------------------------------------|-------------------------------------|-------------------------|--------------------------------|
| CON 01     | negative               | 68             | post               | white | no                      | 12                        | large central pelvic mass arising from uterus                              | hernia sac                          | peritoneal wash         | negative                       |
| CON 02     | negative               | 67             | post               | white | no                      | 10.5                      | adnexal mass with solid nodularity                                         | mucinous cystadenoma                | peritoneal wash         | negative                       |
| CON 03     | negative               | 79             | post               | white | no                      | 26.4                      | cystic mass arising from left ovary                                        | leiomyomata                         | peritoneal wash         | negative                       |
| CON 04     | negative               | 55             | post               | white | no                      | 7.9                       | complex right adnexal mass                                                 | mucinous cyst                       | peritoneal wash         | negative                       |
| CON 05     | negative               | 59             | post               | white | no                      | 7                         | complex pelvic mass                                                        | struma ovarii                       | peritoneal wash         | negative                       |
| CON 06     | negative               | 73             | post               | white | no                      | not detected              | persistent, large, complex pelvic mass                                     | serous cystadenofibroma             | peritoneal wash         | negative                       |
| CON 07     | negative               | 67             | post               | white | no                      | 71                        | large, complex mass with nodularity & calcifications                       | brenner tumor, mucinous cystadenoma | peritoneal wash         | negative                       |
| CON 08     | negative               | 58             | post               | white | no                      | 11.7                      | right adnexal mass                                                         | cystadenofibroma                    | peritoneal wash         | negative                       |
| CON 09     | negative               | 63             | post               | na    | no                      | 58                        | right cystic mass with internal debris                                     | simple cyst                         | peritoneal wash         | negative                       |
| CON 10     | negative               | 63             | post               | white | no                      | 7                         | ovarian mass w/ fluid filled structures, echogenic debris, thickened septa | struma ovarii, endometriosis        | peritoneal wash         | negative                       |
| CON 11     | BRCA1                  | 43             | pre                | white | no                      | 8                         | prophylactic salpingo-oophorectomy for risk reduction                      | no gross or microscopic pathology   | peritoneal wash         | negative                       |
| CON 12     | BRCA2                  | 45             | post               | white | no                      | not detected              | prophylactic salpingo-oophorectomy for risk reduction                      |                                     | peritoneal wash         | negative                       |
| CON 13     | BRCA1                  | 41             | pre                | white | no                      | 10                        | prophylactic salpingo-oophorectomy for risk reduction                      |                                     | peritoneal wash         | negative                       |
| CON 14     | BRCA2                  | 46             | pre                | white | no                      | 16                        | prophylactic salpingo-oophorectomy for risk reduction                      |                                     | peritoneal wash         | negative                       |
| CON 15     | BRCA2                  | 45             | pre                | white | yes (breast cancer)     | 23                        | prophylactic salpingo-oophorectomy for risk reduction                      |                                     | peritoneal wash         | negative                       |
| CON 16     | BRCA1                  | 33             | pre                | white | no                      | 11                        | prophylactic salpingo-oophorectomy for risk reduction                      |                                     | peritoneal wash         | negative                       |
| CON 17     | BRCA1                  | 37             | pre                | white | no                      | 10                        | prophylactic salpingo-oophorectomy for risk reduction                      |                                     | ascites                 | negative                       |
| CON 18     | BRCA2                  | 50             | post               | white | yes (breast cancer)     | 11                        | prophylactic salpingo-oophorectomy for risk reduction                      |                                     | peritoneal wash         | negative                       |
| CON 19     | BRCA1                  | 32             | pre                | white | no                      | 5                         | prophylactic salpingo-oophorectomy for risk reduction                      |                                     | peritoneal wash         | negative                       |
| CON 20     | BRCA2                  | 52             | post               | na    | no                      | 7                         | prophylactic salpingo-oophorectomy for risk reduction                      |                                     | peritoneal wash         | negative                       |

**SI Appendix Table S3. Detection of ovarian cancer TP53 mutations in peritoneal fluid**

| sample ID | FIGO clinical stage | sequencing method | primary tumor TP53 mutation genomic coordinate (hg19) | amino acid change | mutation type | tumor TP53 mutation detected in matched peritoneal fluid? | total TP53 tumor mutant molecules detected | total DCS nucleotides (DCS depth) at tumor allele | tumor mutant allele frequency in matched peritoneal fluid |
|-----------|---------------------|-------------------|-------------------------------------------------------|-------------------|---------------|-----------------------------------------------------------|--------------------------------------------|---------------------------------------------------|-----------------------------------------------------------|
| OvCA 01   | 0*                  | Sanger            | Chr17:7578265 A>G                                     | I195T             | missense      | yes                                                       | 1                                          | 3421                                              | 2.92E-04                                                  |
| OvCA 02   | IA*                 | Sanger            | Chr17:7578203 C>T                                     | V216M             | missense      | no                                                        | 0                                          | 5829                                              | not detected                                              |
| OvCA 03   | IC*                 | Sanger            | Chr17:7578437 G>A                                     | Q165X             | nonsense      | yes                                                       | 7269                                       | 14042                                             | 5.18E-01                                                  |
| OvCA 04   | IA                  | NGS               | Chr17:7578394 T>C                                     | H179R             | missense      | yes                                                       | 2                                          | 8671                                              | 2.31E-04                                                  |
| OvCA 05   | IC                  | NGS               | Chr17:7578461 C>A                                     | V157F             | missense      | yes                                                       | 164                                        | 3280                                              | 5.00E-02                                                  |
| OvCA 06   | IIB                 | NGS               | Chr17:7577124 C>T                                     | V272M             | missense      | yes                                                       | 1                                          | 23921                                             | 4.18E-05                                                  |
| OvCA 07   | IIC                 | NGS               | Chr17:7578403 C>T                                     | C176Y             | missense      | yes                                                       | 99                                         | 6376                                              | 1.55E-02                                                  |
| OvCA 08   | IIC                 | NGS               | Chr17:7578555 C>T                                     | na                | splice        | yes                                                       | 4                                          | 3672                                              | 1.09E-03                                                  |
| OvCA 09   | IIIB                | NGS               | Chr17:7578442 T>C                                     | Y163C             | missense      | yes                                                       | 3                                          | 12440                                             | 2.41E-04                                                  |
| OvCA 10   | IIIB                | NGS               | Chr17:7578526 C>T                                     | C135Y             | missense      | yes                                                       | 30                                         | 5238                                              | 5.73E-03                                                  |
| OvCA 11   | IIIB                | NGS               | Chr17:7577548 C>T                                     | G245S             | missense      | yes                                                       | 22                                         | 1868                                              | 1.18E-02                                                  |
| OvCA 12   | IIIC                | NGS               | Chr17:7577538 C>T                                     | R248Q             | missense      | yes                                                       | 275                                        | 10427                                             | 2.64E-02                                                  |
| OvCA 13   | IIIC                | NGS               | Chr17:7577551 C>T                                     | G244S             | missense      | yes                                                       | 2                                          | 3733                                              | 5.36E-04                                                  |
| OvCA 14   | IIIC                | NGS               | Chr17:7574003 G>A                                     | R342X             | nonsense      | yes                                                       | 12                                         | 1749                                              | 6.86E-03                                                  |
| OvCA 15A† | na                  | NGS               | Chr17:7578275 G>A                                     | Q192X             | nonsense      | yes                                                       | 1                                          | 24737                                             | 4.04E-05                                                  |
| OvCA 15B† | Recurrence          | NGS               | Chr17:7578275 G>A                                     | Q192X             | nonsense      | yes                                                       | 3949                                       | 5762                                              | 6.85E-01                                                  |
| OvCA 16   | Recurrence          | NGS               | Chr17:7576852 delC                                    | na                | indel         | yes                                                       | 2**                                        | 31027**                                           | 6.45E-05                                                  |

Abbreviations: OvCa, ovarian cancer; NGS, Next Generation Sequencing; DCS, Duplex Consensus Sequence; na, not applicable

\*Microscopic cancers incidentally discovered at prophylactic surgery in women with germline BRCA mutations

\*\*Numbers correspond to single strand consensus sequences (SSCS) instead of DCS. Mutation was not detected in DCS reads, but it was detected in 2 SSCS reads well above background artifact.

†Samples 15A and 15B correspond to primary and recurrence surgeries from the same patient

**SI Appendix Table S4. Multivariate models for tumor-specific *TP53* mutant allele frequency in peritoneal fluid of women with ovarian cancer**

|               | <i>variable name</i>   | <i>estimate</i> | <i>SE</i> | <i>T-stat</i> | <i>p-value</i> |
|---------------|------------------------|-----------------|-----------|---------------|----------------|
| <b>Model1</b> | Ascites                | 0.008           | 0.003     | 2.608         | 0.023          |
|               | Positive cytology      | 0.001           | 0.003     | 0.338         | 0.741          |
| <b>Model2</b> | Ascites                | 0.008           | 0.002     | 3.507         | 0.005          |
|               | Age                    | 0.003           | 0.001     | 2.875         | 0.015          |
|               | Positive cytology      | -0.002          | 0.003     | -0.697        | 0.500          |
| <b>Model3</b> | Ascites                | 0.007           | 0.002     | 3.568         | 0.004          |
|               | Age                    | 0.003           | 0.001     | 2.642         | 0.023          |
|               | Germline BRCA mutation | 0.002           | 0.002     | 0.659         | 0.523          |
| <b>Model4</b> | Ascites                | 0.007           | 0.002     | 3.730         | 0.003          |
|               | Age                    | 0.002           | 0.001     | 2.784         | 0.018          |
|               | Plasma CA-125          | 0.001           | 0.001     | 1.080         | 0.303          |
| <b>Model5</b> | Ascites                | 0.008           | 0.002     | 3.565         | 0.005          |
|               | Age                    | 0.003           | 0.001     | 2.972         | 0.014          |
|               | Future recurrence      | 0.002           | 0.002     | 0.954         | 0.363          |
| <b>Model6</b> | Ascites                | 0.007           | 0.002     | 3.573         | 0.005          |
|               | Age                    | 0.003           | 0.001     | 2.994         | 0.013          |
|               | Stage                  | -0.001          | 0.002     | -0.589        | 0.569          |

Notes: Tumor mutant allele frequency and plasma CA-125 were log transformed. Stage comparison was done as early (FIGO 1 and 2) vs late (FIGO 3 or recurrence)

## SUPPLEMENTARY FIGURE LEGENDS

**Fig. S1.** Overview of Duplex Sequencing. (A) Ligation of Duplex Sequencing adaptors and PCR. Duplex Sequencing adaptors contain a molecular tag consisting of a randomized nucleotide sequence (represented as  $\alpha$  (cyan) and  $\beta$  (orange)) and two universal priming sites (purple and green). DNA is fragmented (yellow) and ligated to Duplex Sequencing adaptors. PCR produces copies of both strands of DNA, which can be identified as  $\alpha\beta$  or  $\beta\alpha$ . (B) Bioinformatic workflow of Duplex Sequencing. Colored dots represent mutations (green: true mutation; blue and purple: PCR or sequencing error; brown: first-round PCR error or DNA damage). Raw sequencing reads are grouped by "family" ( $\alpha\beta$  and  $\beta\alpha$ ) and a Single-Strand Consensus Sequence (SSCS) is determined. Mutations not present in all reads (e.g. blue and purple dots) are errors that are filtered out. The SSCSs from reciprocal families ( $\alpha\beta$  and  $\beta\alpha$ ) are paired and their sequences are compared to form a Duplex Consensus Sequence (DCS). Mutations present in only one SSCS (brown dot) are first-round PCR errors or artifacts of DNA damage and are filtered out. Only mutations present in both strands of DNA (green dot) are true mutations.

**Fig. S2.** Total "biological background" *TP53* mutations per sample is directly proportional to total Duplex Consensus Sequence (DCS) nucleotides sequenced. Each dot corresponds to a peritoneal fluid sample. "Biological background" *TP53* mutations are all *TP53* mutations in exons 4-10 detected by Duplex Sequencing except the tumor *TP53* mutation.

**Fig. S3.** Comparison of *TP53* mutations found as "biological background" in peritoneal fluid of women with and without ovarian cancer to the catalogue of clonal *TP53* mutations in ovarian serous cystadenocarcinomas in the International Agency for Research on Cancer (IARC) *TP53* database. The catalogue includes 890 non-synonymous *TP53* mutations, which were compared to 85 and 90 non-synonymous "biological background" *TP53* mutations in peritoneal fluid from women with ovarian cancer and controls, respectively. The mutation types were not statistically significantly different (Pearson Chi-Square  $p$ -value  $> 0.05$ ) between the three groups.

**Fig. S4.** Comparison of expected *TP53* mutations in exons 5-8 based on all possible single nucleotide substitutions (1567 total substitutions, as described in Petitjean *et al*, reference 23 in article) vs. observed *TP53* "biological background" mutations in exons 5-8 in peritoneal fluid of women with and without cancer (59 and 70 mutations, respectively).

**Fig. S5.** Characterization of *TP53* mutations found as "biological background" in peritoneal fluid of women with and without ovarian cancer and with and without hereditary *BRCA1/2* mutations (*BRCA*+/-) by mutation type (A) and pathogenicity of missense mutations (B). *TP53* activity associated with missense mutations was determined via "MUT-*TP53* 2.00" as described in Soussi T. *et al* (reference 24 in article).

**Fig. S6.** Mutation type of "biological background" *TP53* mutations found in individual peritoneal fluid samples from cases (A) and controls (B). Y-axis shows mutation counts. Abbreviations: OvCA, ovarian cancer; Con: control.

**Fig. S7.** Functional *TP53* activity associated with each "biological background" missense mutation in individual peritoneal fluid samples from cases (A) and controls (B). Y-axis shows mutation counts. Functional *TP53* activity was determined via "MUT-*TP53* 2.00" as described in Soussi T. *et al* (reference 24 in article). Abbreviations: OvCA, ovarian cancer; Con: control.

**Fig. S8.** Frequency of "biological background" *TP53* mutations in exons and introns of ovarian cancer and control peritoneal fluid samples. For each individual, the frequency of "biological background" *TP53* mutations was calculated as the number of non-tumor mutations divided by the total number of Duplex

Consensus Sequence nucleotides. This calculation was done separately for exons and introns. The plot shows the mean frequency of *TP53* “biological background” mutations for controls (blue) and ovarian cancers (red) in exons and introns. Error bars indicate the standard error of the mean. The p-values correspond to non-parametric comparisons of means between two groups using 2-tailed Mann-Whitney tests. Abbreviation: ns, non significant.

**Fig. S9.** Comparison of “biological background” *TP53* mutations found in peritoneal fluid (197 mutations) and peripheral blood (57 mutations). The fraction of mutations is indicated for categories of mutation type (A), pathogenicity (B), and spectrum (C). The mutations found in peritoneal fluid and peripheral blood are not statistically significantly different in terms of their type, pathogenicity, and spectrum (Pearson Chi-Square p-value>0.05 in A, B and C). *TP53* activity was determined via “MUT-*TP53* 2.00” as described in Soussi T. *et al* (reference 24 in article).



A.

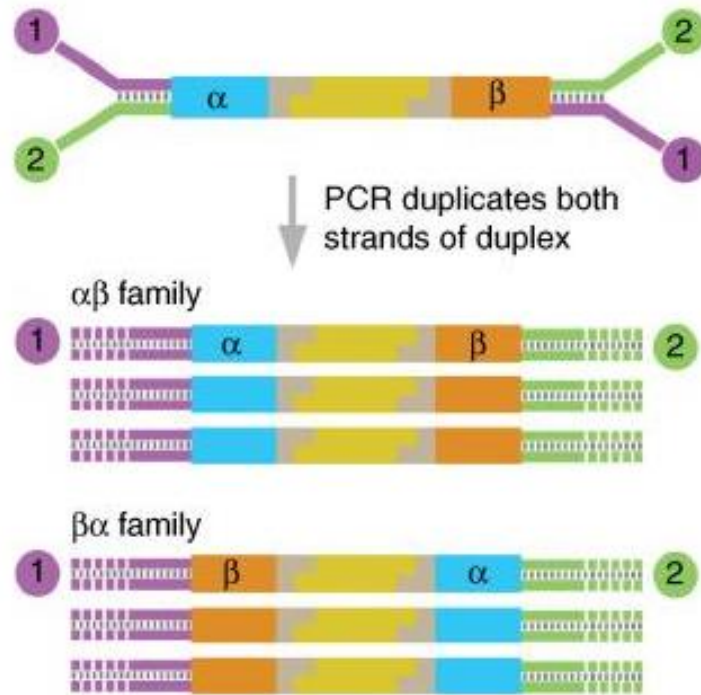

B.

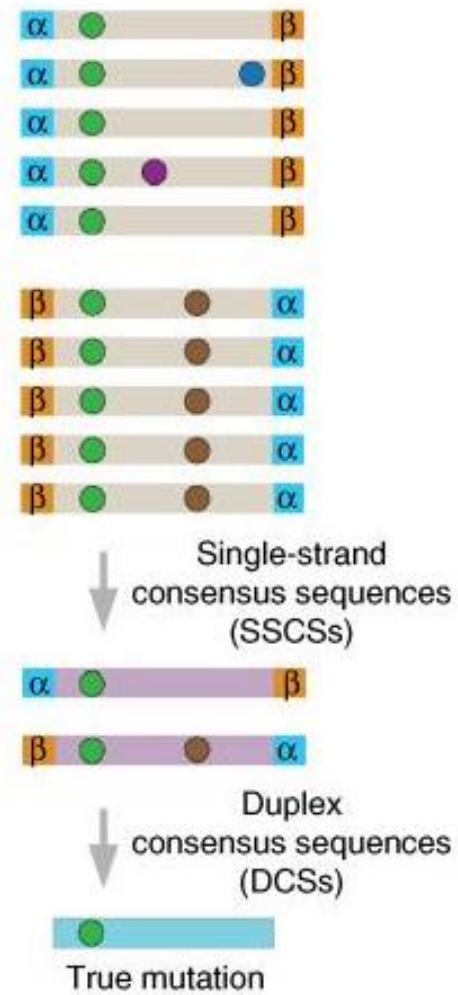

SI Appendix, Fig. S2

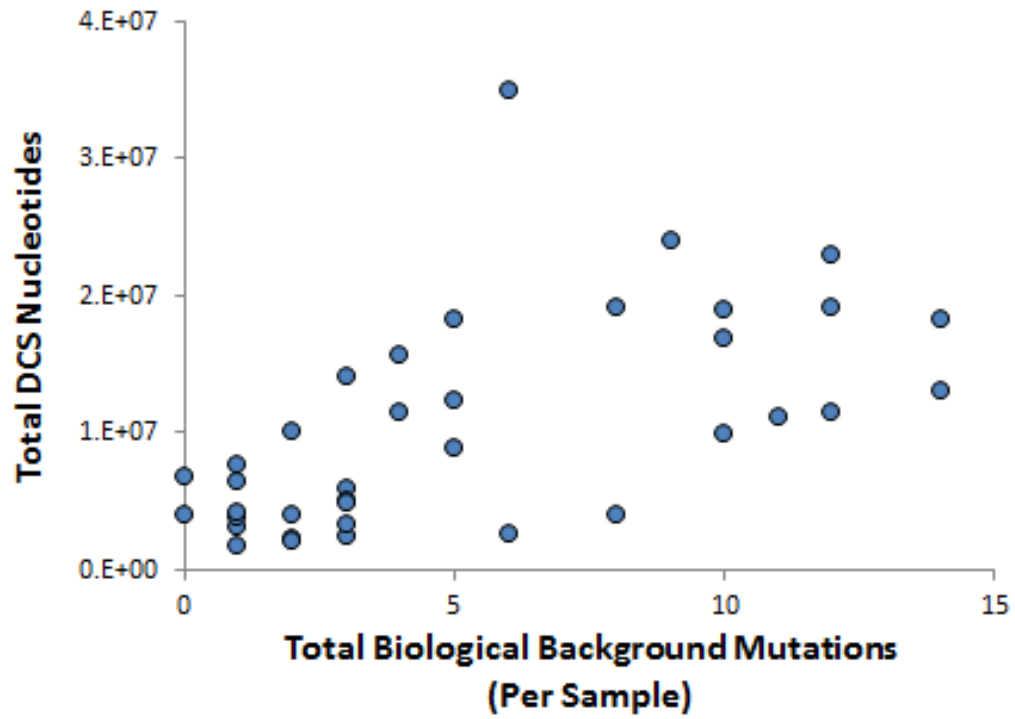

SI Appendix, Fig. S3

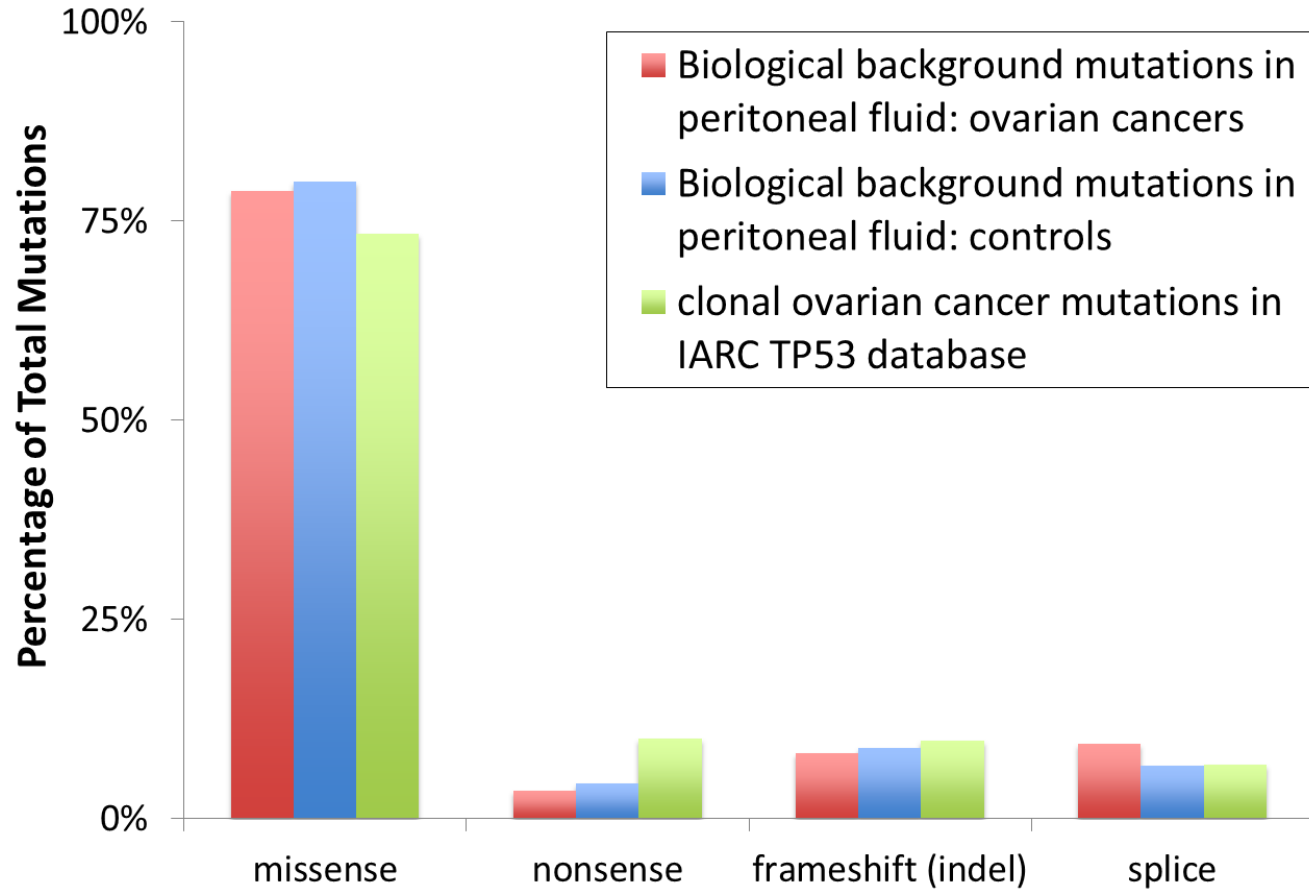

**Expected distribution of single nucleotide substitutions in TP53 exons 5-8**

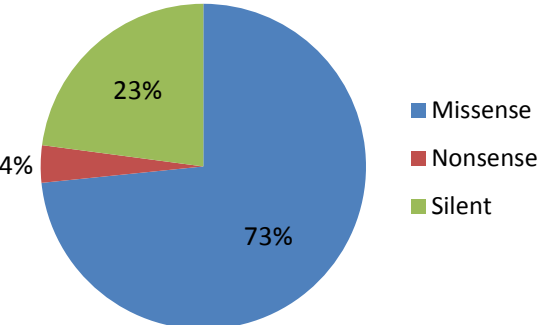

**Biological background mutations in peritoneal fluid (TP53 exons 5-8): controls**

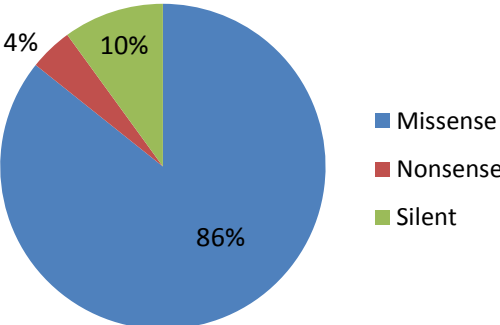

**Biological background mutations in peritoneal fluid (TP53 exons 5-8): cancers**

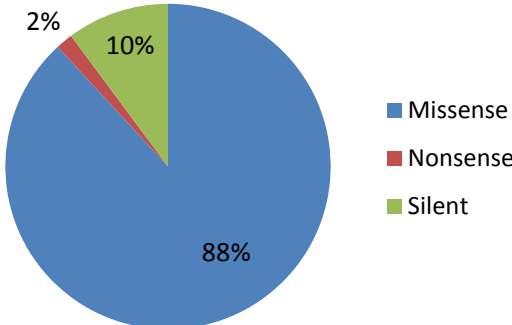

# SI Appendix, Fig. S5

## A

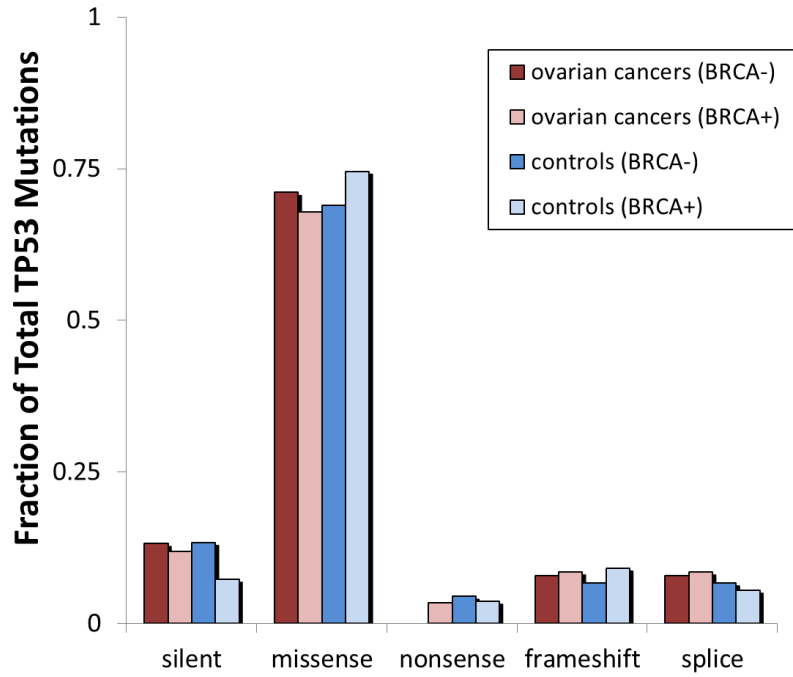

## B

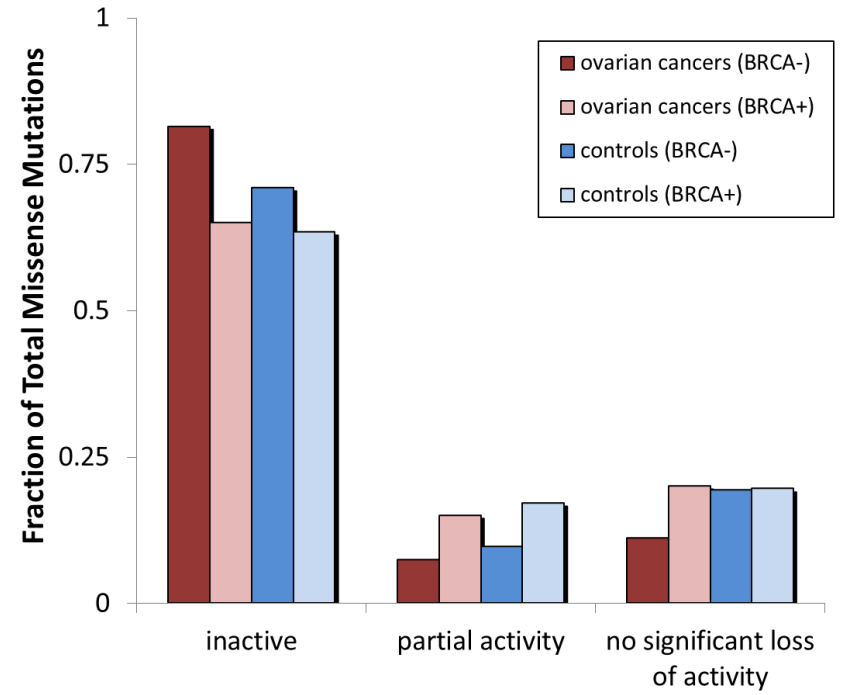

A

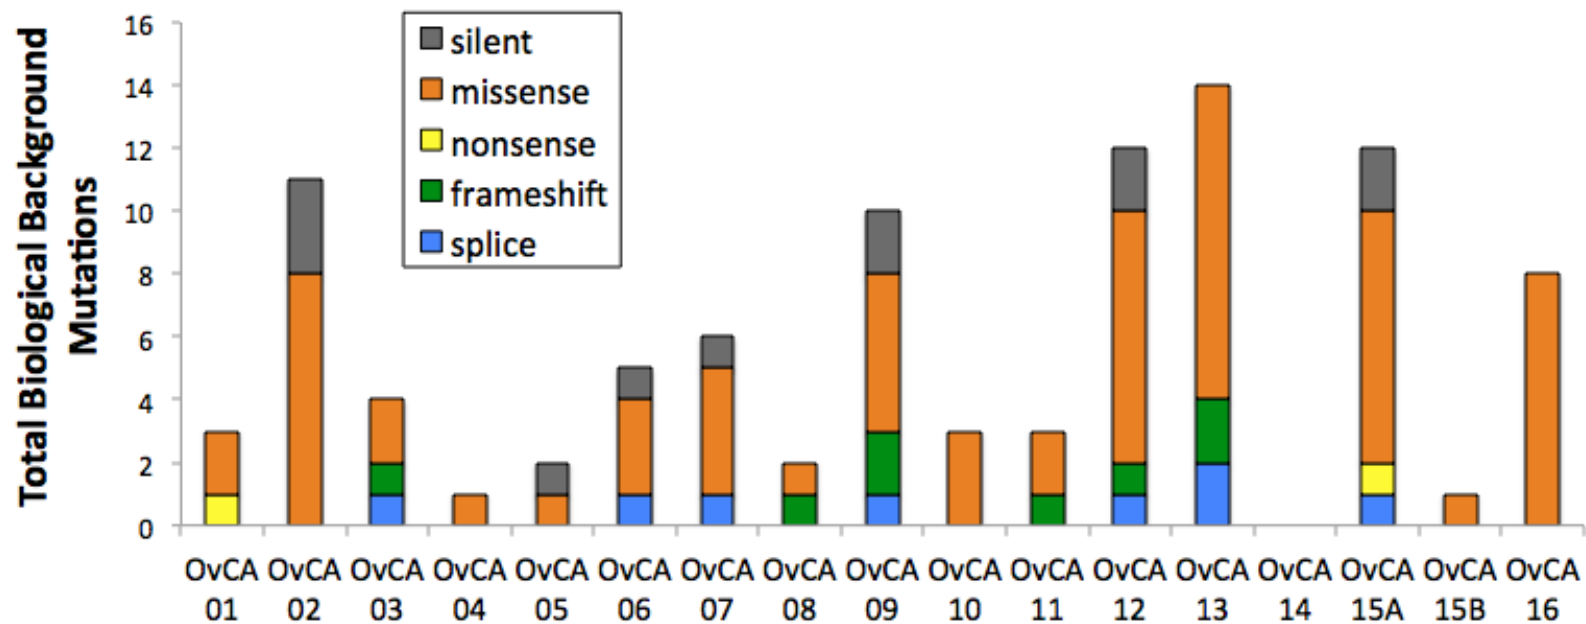

B

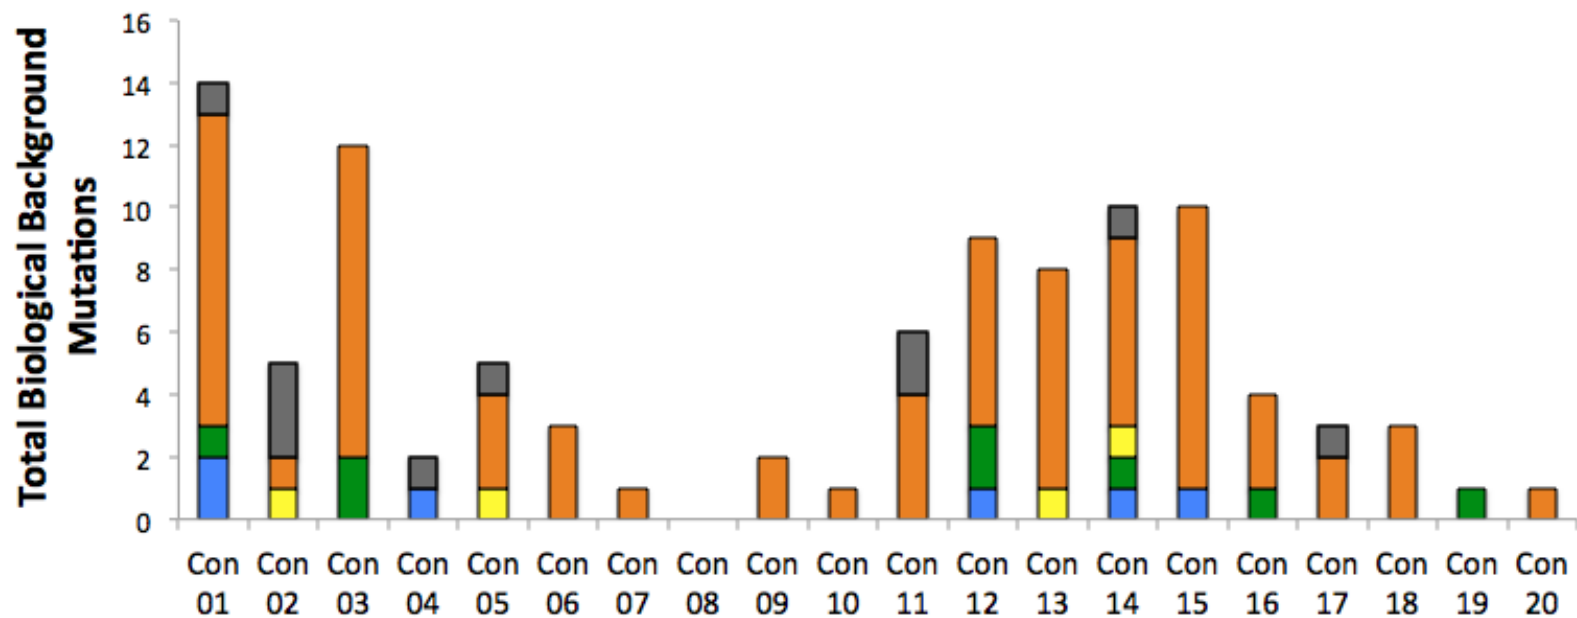

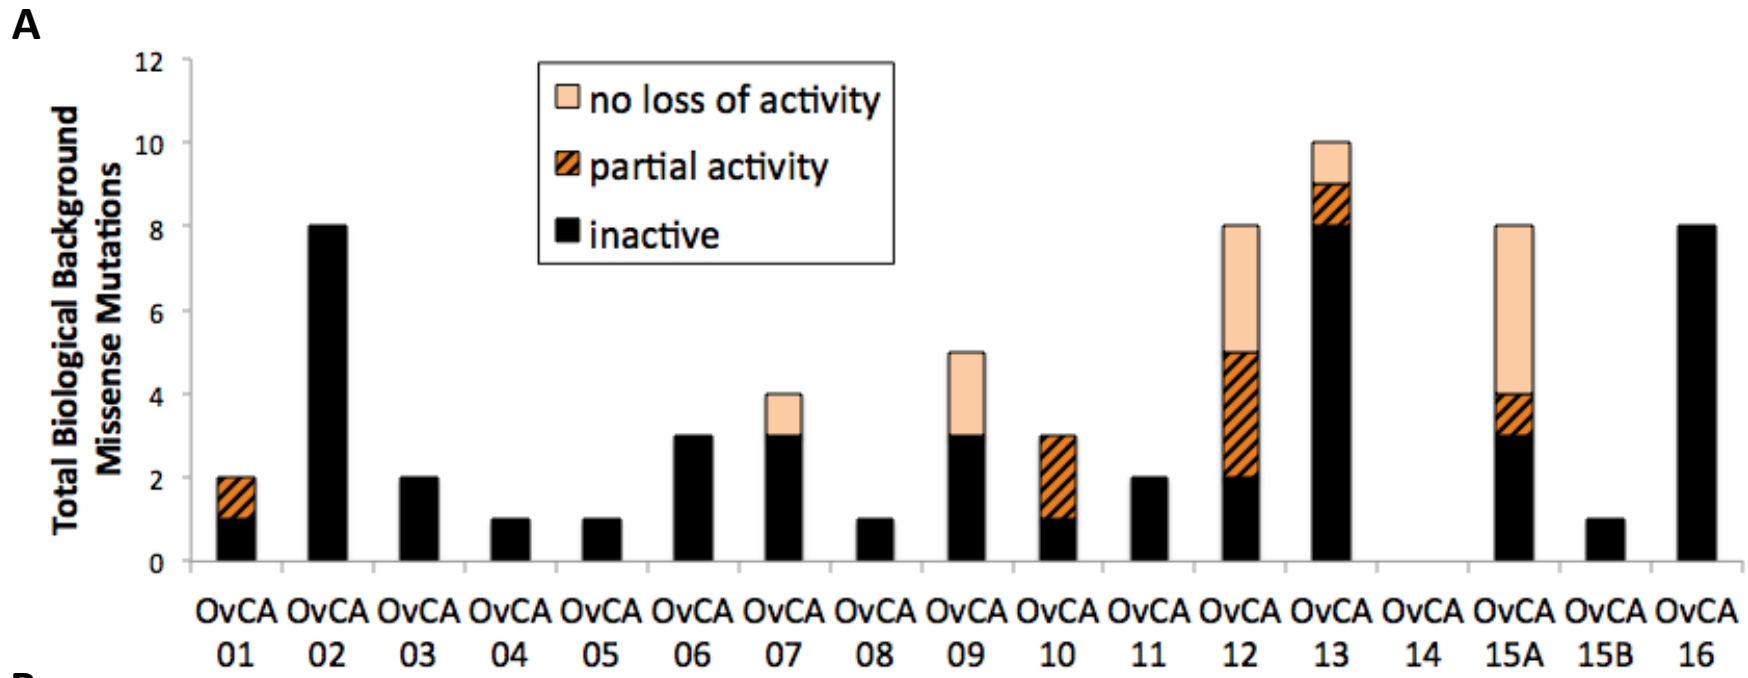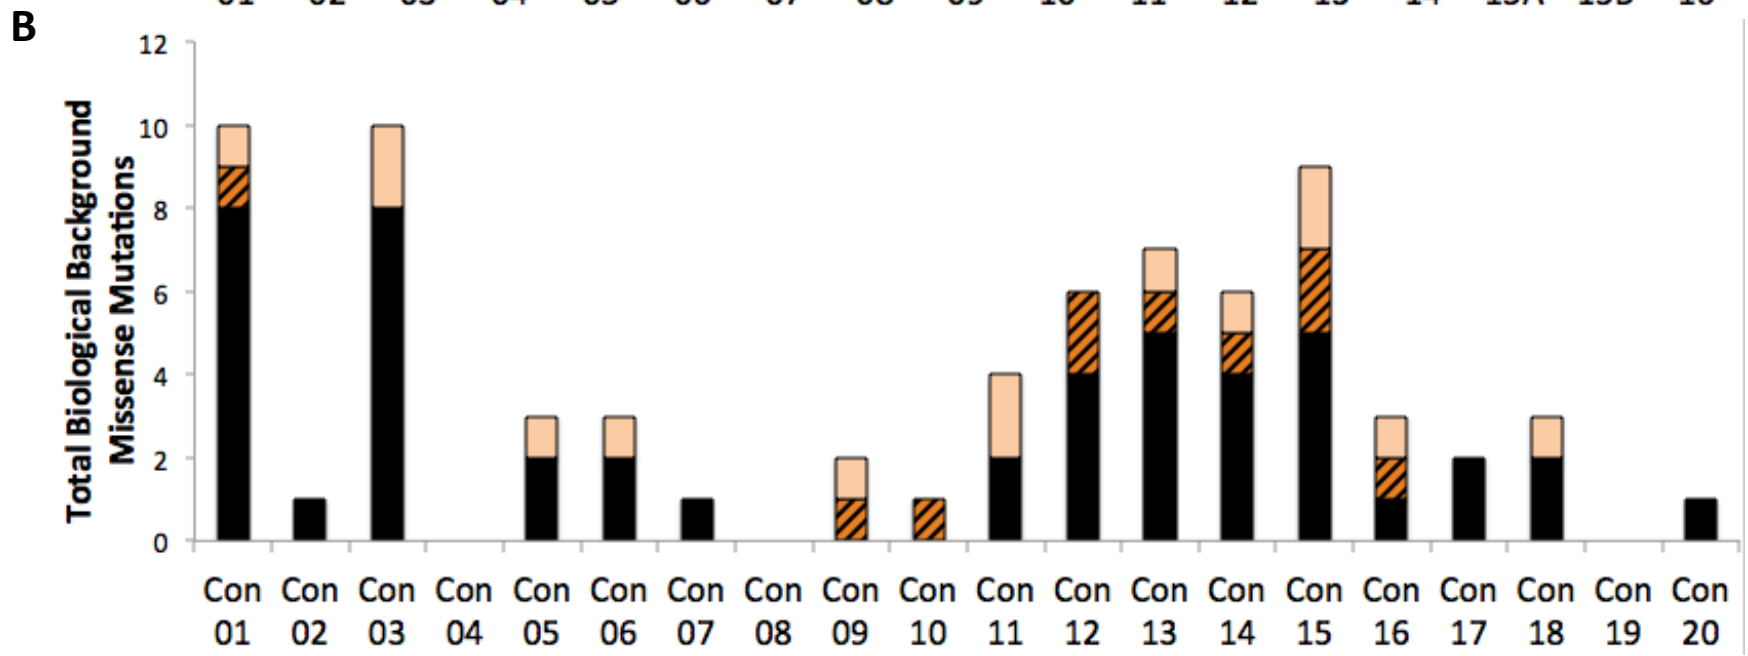

SI Appendix, Fig. S8

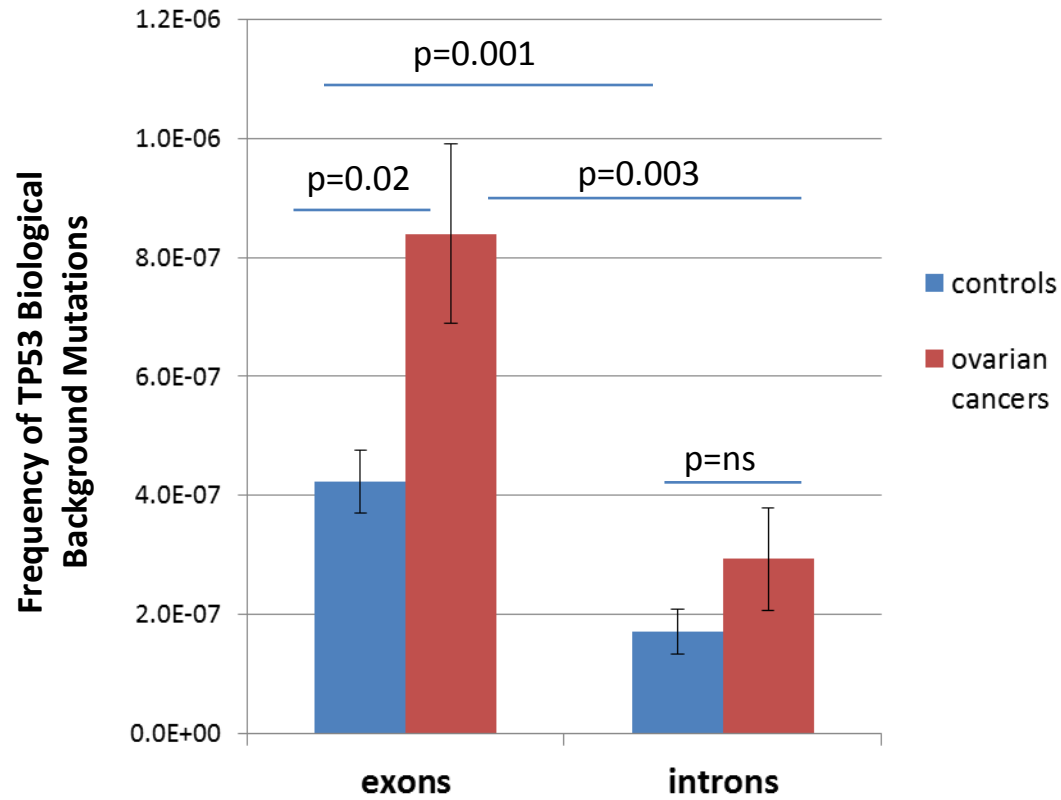



SI Appendix, Fig. S9

**A**

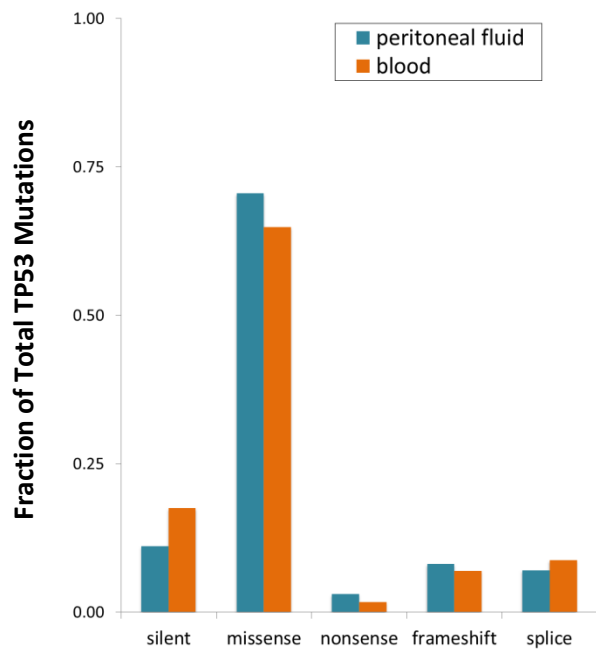

**B**

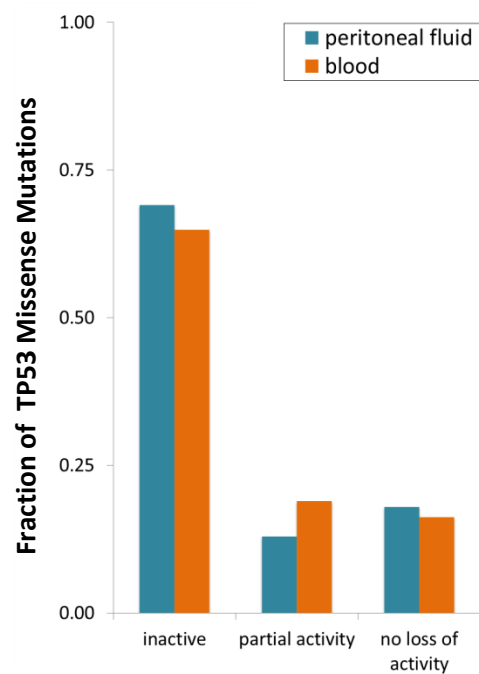

**C**

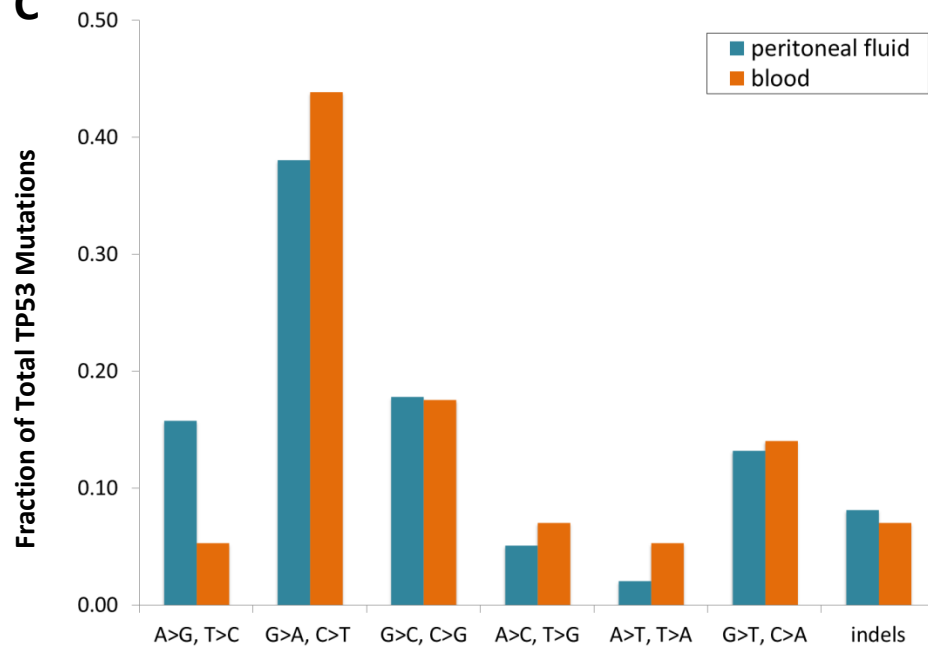

Supplement: pnas.1601311113.sapp.pdf [file pnas.1601311113.sapp.pdf]
